# Supplementary material
Source: PubMed Central journal article supplement (PMC2766343)
Supplement: supp_136_22_3821__1.pdf [file supp_136_22_3821__1.pdf]

**Table S1. Gene expression in agametic gonads**

| Gene          | Agametic XY gonad<br>(stained/total) | Agametic XX gonad<br>(stained/total) |
|---------------|--------------------------------------|--------------------------------------|
| <i>CG9253</i> | 0% (0/42)                            | 0% (0/33)                            |
| <i>CG6751</i> | 0% (0/54)                            | 0% (0/31)                            |
| <i>Rs1</i>    | 0% (0/31)                            | 0% (0/30)                            |
| <i>RanGap</i> | 0% (0/28)                            | 0% (0/39)                            |
| <i>CG6693</i> | 0% (0/64)                            | 0% (0/41)                            |
| <i>Klp61F</i> | 0% (0/22)                            | 0% (0/50)                            |
| <i>otu</i>    | 0% (0/52)                            | 0% (0/52)                            |
| <i>dpa</i>    | 47% (26/55)                          | 0% (0/49)                            |
| <i>Mcm5</i>   | 39% (12/31)                          | 0% (0/23)                            |
| <i>Jheh2</i>  | 95% (20/21)                          | 0% (0/34)                            |
| <i>CG5149</i> | 0% (0/26)                            | 93% (26/28)                          |
| <i>CG9925</i> | 0% (0/23)                            | 0% (0/28)                            |

Percentage of XX or XY *Drosophila* embryos with gonad expression in agametic embryos (*osk*<sup>301/CE4</sup>).

*CG9925* is a non-sex-specific germ cell gene.
